# Supplementary material for: Theoretical investigations on reactivity influencing factors of ˙Mn(CO)5 catalyzed alkyne hydrosilylation and hydrogermylation
Source: Royal Society of Chemistry journal article supplement (doi:10.1039/d2nj05342j), 2022-12-21
Supplement: d2nj05342j2.pdf [file d2nj05342j2.pdf]

## Supporting Information for

# Theoretical Investigations on the Activity Influence Factors of $\cdot\text{Mn}(\text{CO})_5$ Catalyzed Alkynes Hydrosilylation and Hydrogermylation

Jinying Zhang<sup>a</sup>, Bin Lu<sup>b,\*</sup>, Lingpeng Meng<sup>a</sup>, Xiaoyan Li<sup>a,\*</sup>

- a. College of Chemistry and Material Science, Hebei Normal University, Shijiazhuang 050024, P. R. China.
- b. Hebei Key Laboratory of Inorganic and Nano-Materials, National Demonstration Center for Experimental Chemistry, Hebei Normal University, Shijiazhuang 050024, P. R. China.

Email: lubincn@hebtu.edu.cn and lixiaoyan@hebtu.edu.cn

**Fig. S1.** The Gibbs-free energy profiles for hydrogermylation of internal alkyne catalyzed by  $\cdot\text{Mn}(\text{CO})_5$  (relative enthalpies are given in parentheses)

**Fig. S2.** Geometries and key bond lengths (in Å) of stationary points on the PES of hydrogermylation of internal alkyne catalyzed by  $\cdot\text{Mn}(\text{CO})_5$ .

**Fig. S3.** Geometries and key bond lengths (in Å) of stationary points of the complexes formed between  $\cdot\text{Mn}(\text{CO})_5$  and the solvents.

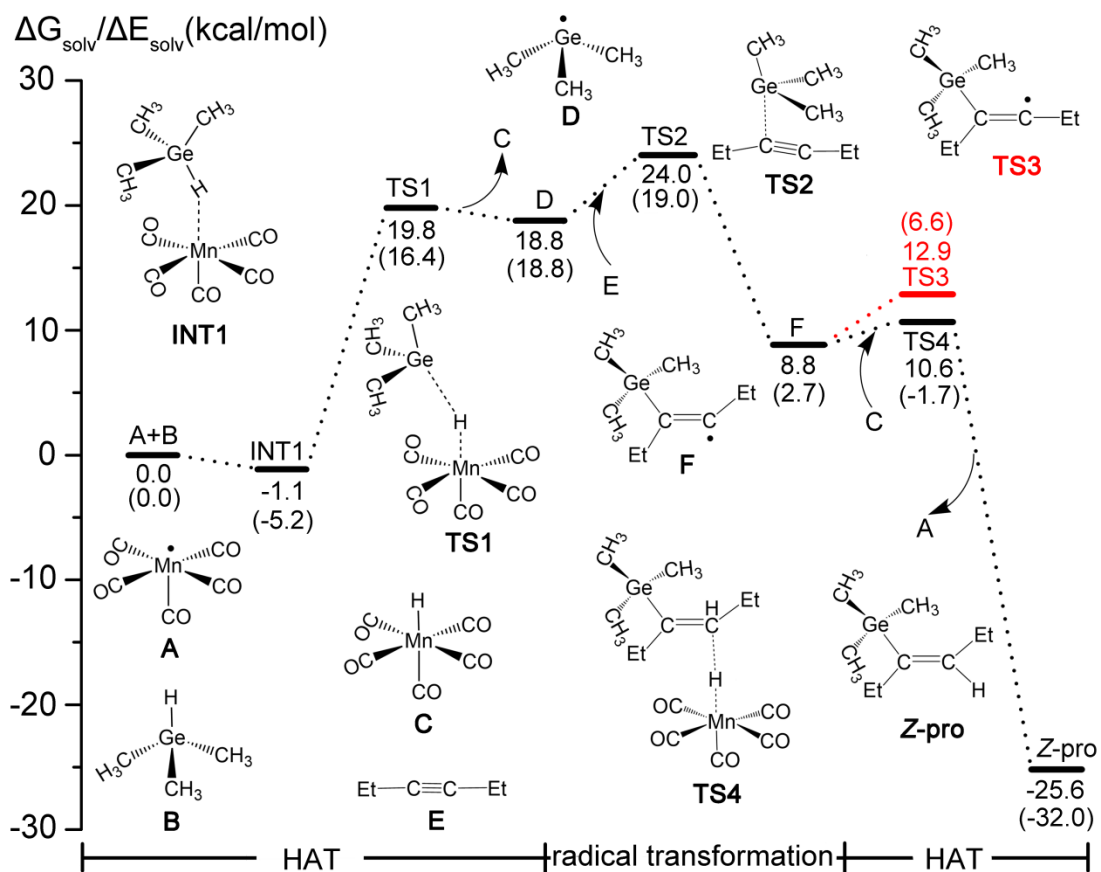

**Fig. S1.** The Gibbs-free energy profiles for hydrogermylation of internal alkyne catalyzed by  $\cdot\text{Mn}(\text{CO})_5$  (relative electronic energies are given in parentheses).

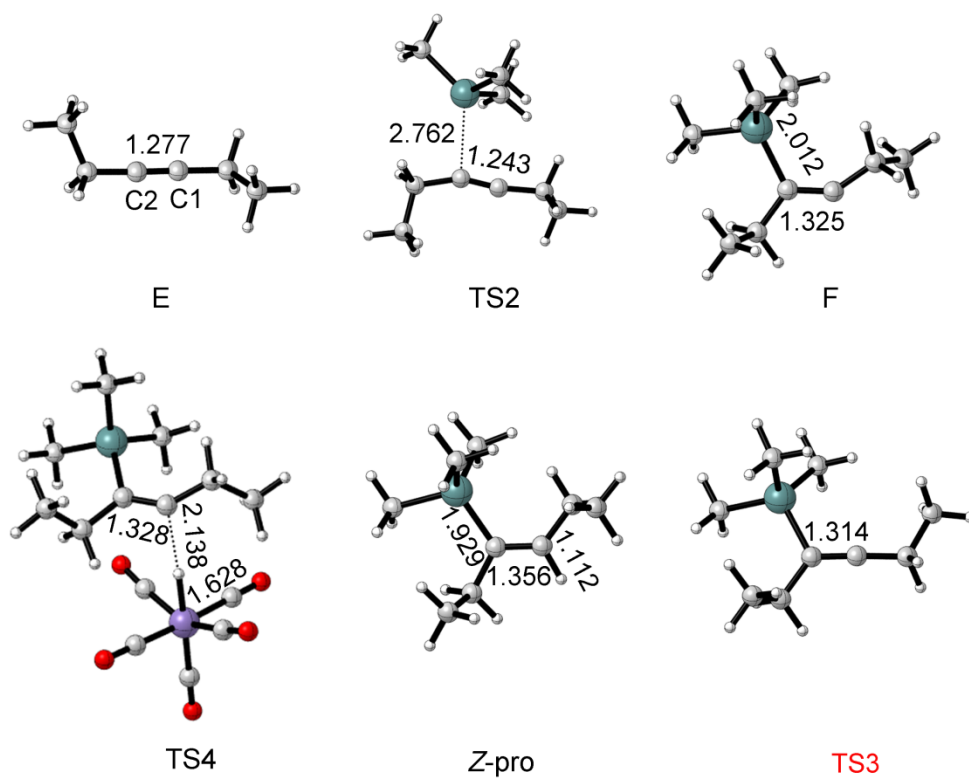

**Fig. S2.** Geometries and key bond lengths (in Å) of stationary points on the PES of hydrogermylation of internal alkyne catalyzed by  $\cdot\text{Mn}(\text{CO})_5$ .

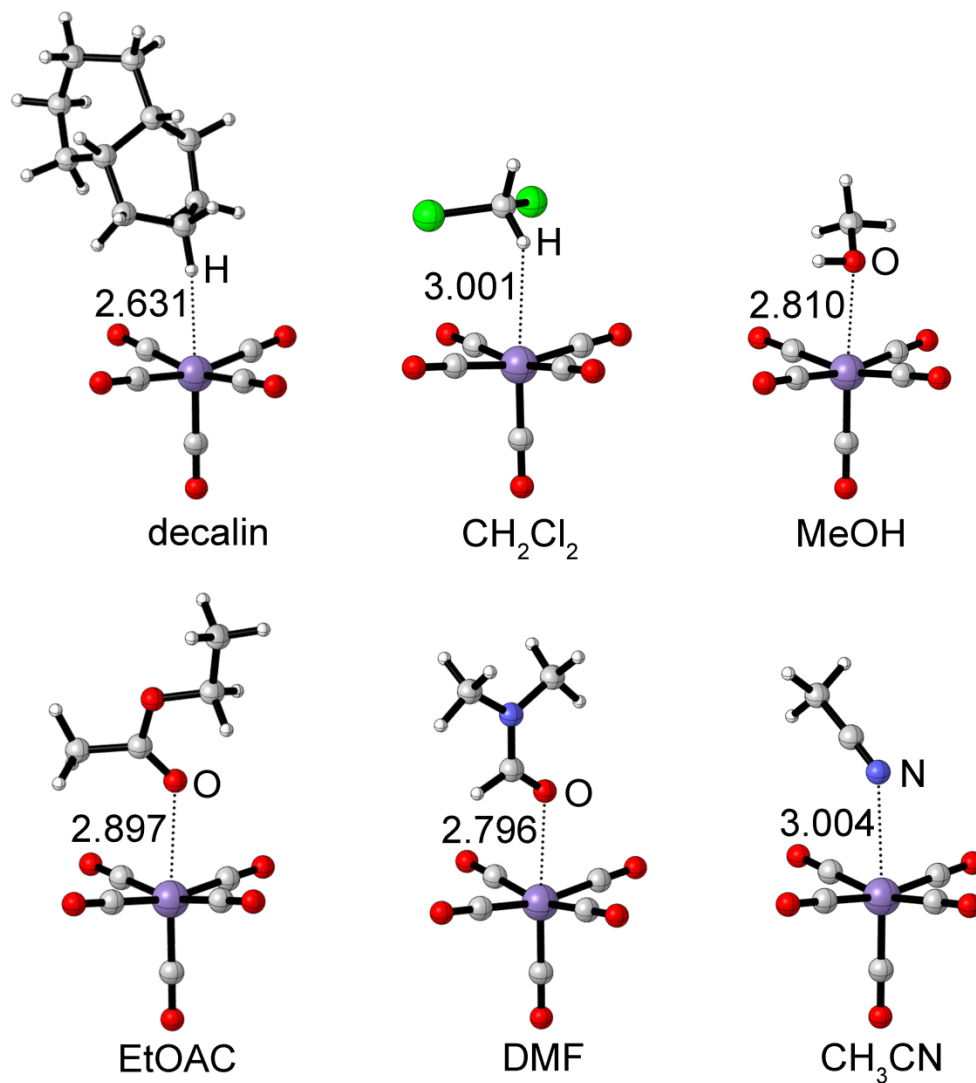

**Fig. S3.** Geometries and key bond lengths (in Å) of stationary points of the complexes formed between  $\cdot\text{Mn}(\text{CO})_5$  and the solvents.
